# Supplementary material for: Novel 1D coordination polymers built from acyclic cryptate containing bis(1H-1,2,4-triazole) ligands and featuring coordinated counteranions
Source: Royal Society of Chemistry journal article supplement (doi:10.1039/c8nj00799c), 2018-01-01
Supplement: c8nj00799c1.pdf [file c8nj00799c1.pdf]

## Supplementary material

# Novel 1D Coordination Polymers Built from Acyclic Cryptate Containing bis(1*H*-1,2,4-triazole) Ligands and featuring Coordinated Counteranions

Mohamed El-Massaoudi, Smaail Radi\*, Amin Salhi, Yahia N. Mabkhot, Salim S. Al-Showiman, Hazem A. Ghabbour, N. N. Adarsh, Yann Garcia \*

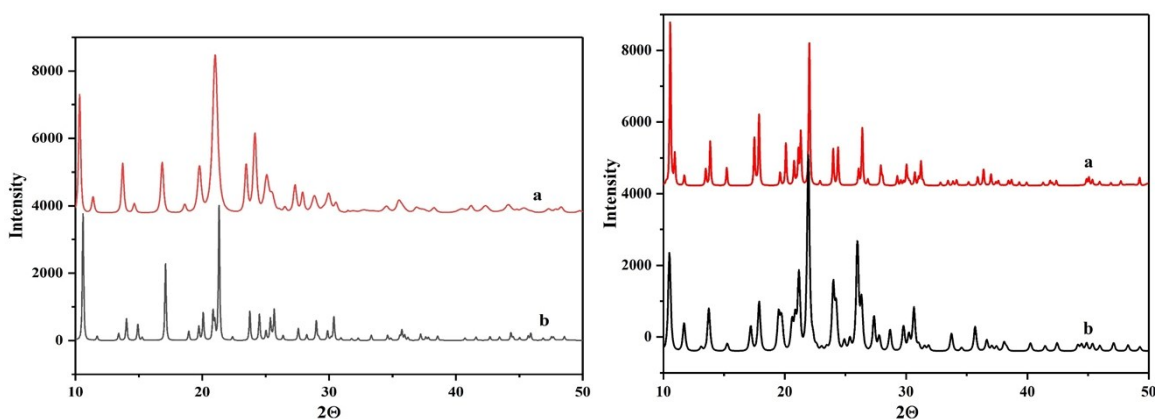

**Fig. S1:** Experimental (a) and simulated (b) PXRD for **1** (left) and **2** (right).

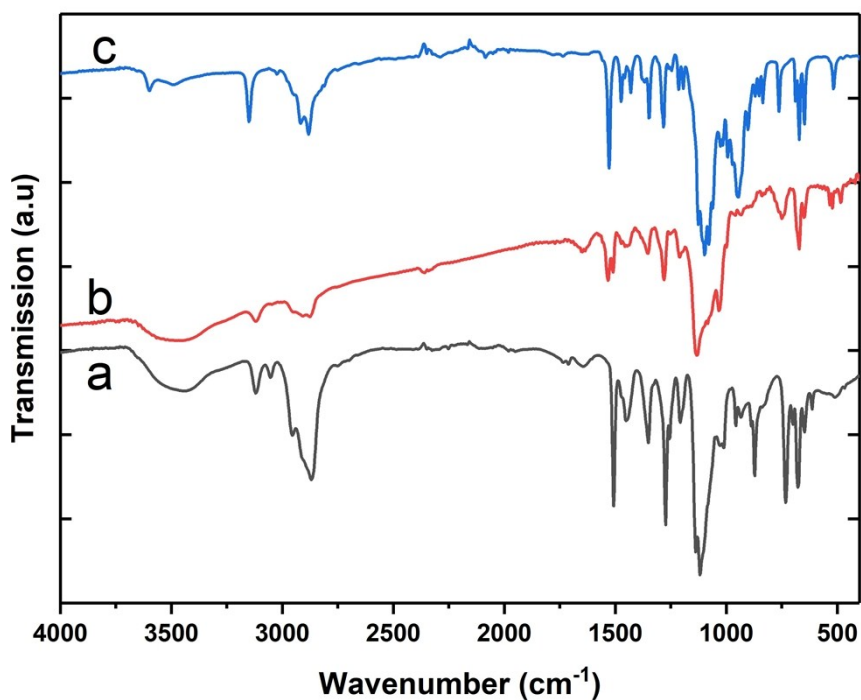

**Figure S2:** IR spectrum of (a) L, (b) **1** and (c) **2**.

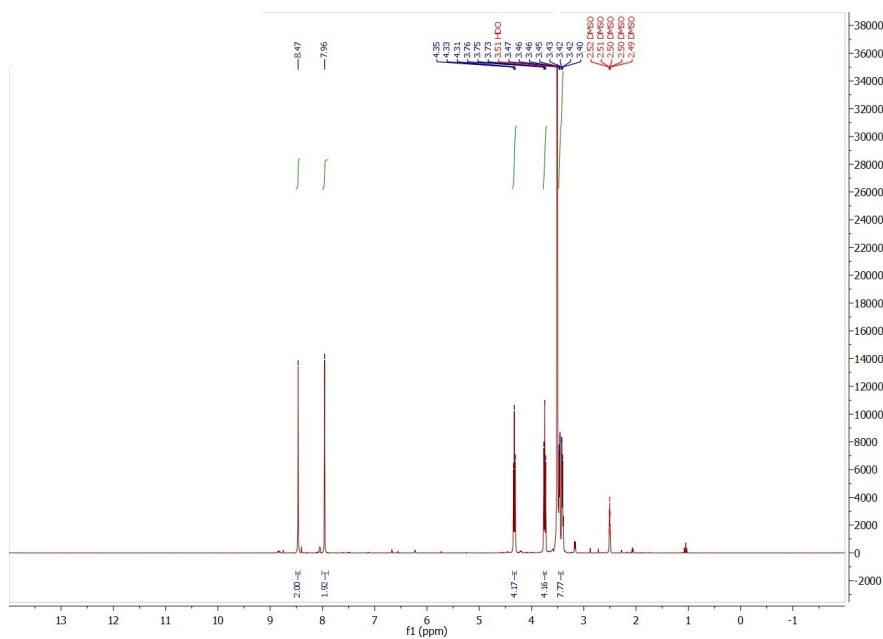

Figure S3:  $^1\text{H}$  NMR spectrum of Ligand.

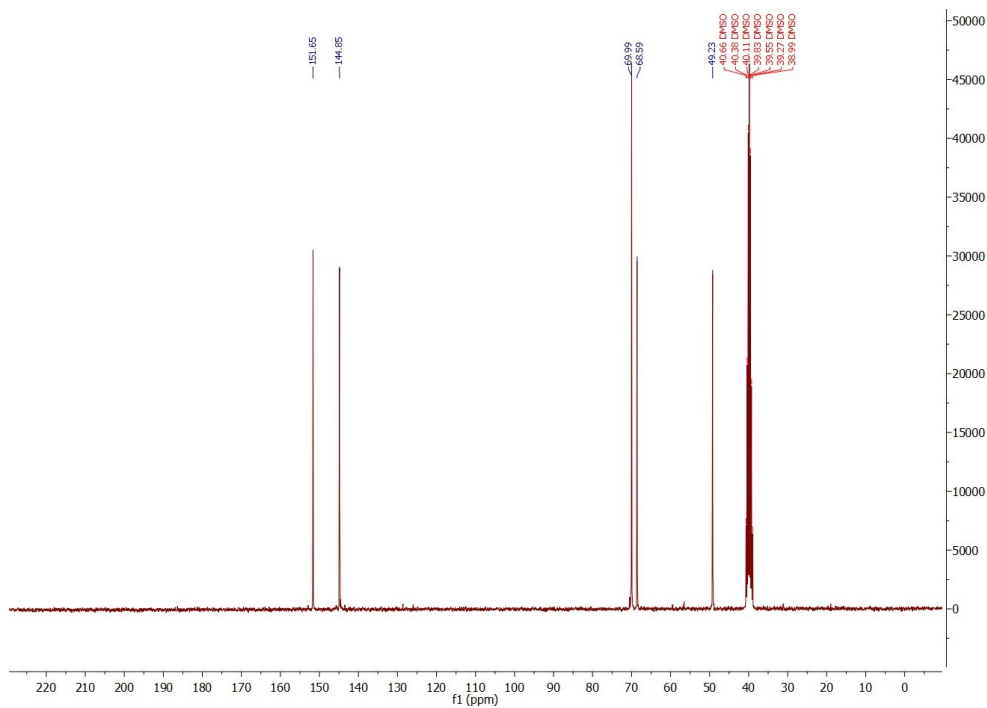

Figure S4:  $^{13}\text{C}$  NMR spectrum of Ligand.

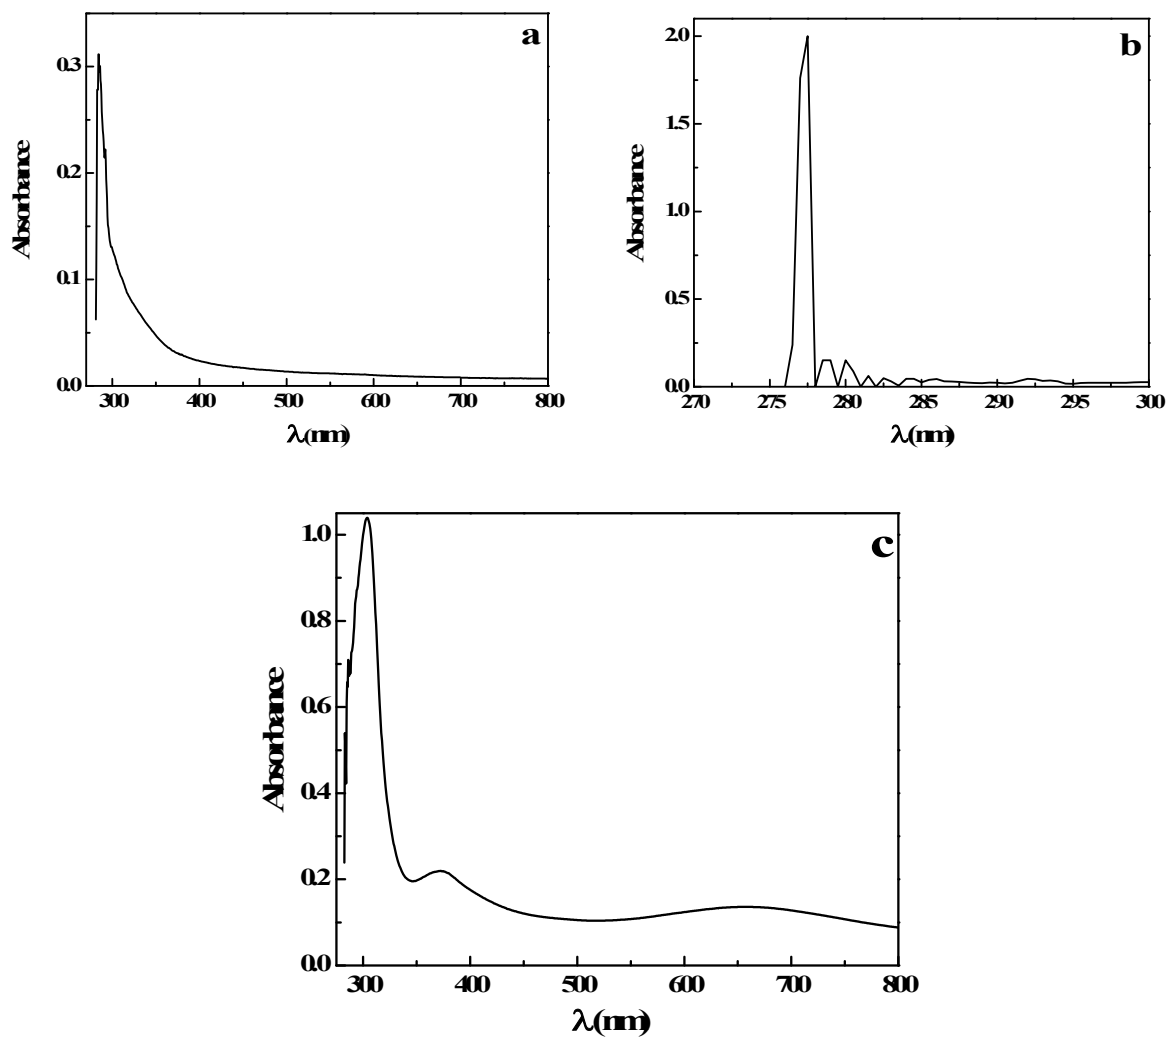

**Fig. S5:** UV-Vis spectra a) of **L** in methanol, b) of **1** in acetonitrile/water (50/50), c) of **2** in acetonitrile/water (50/50).

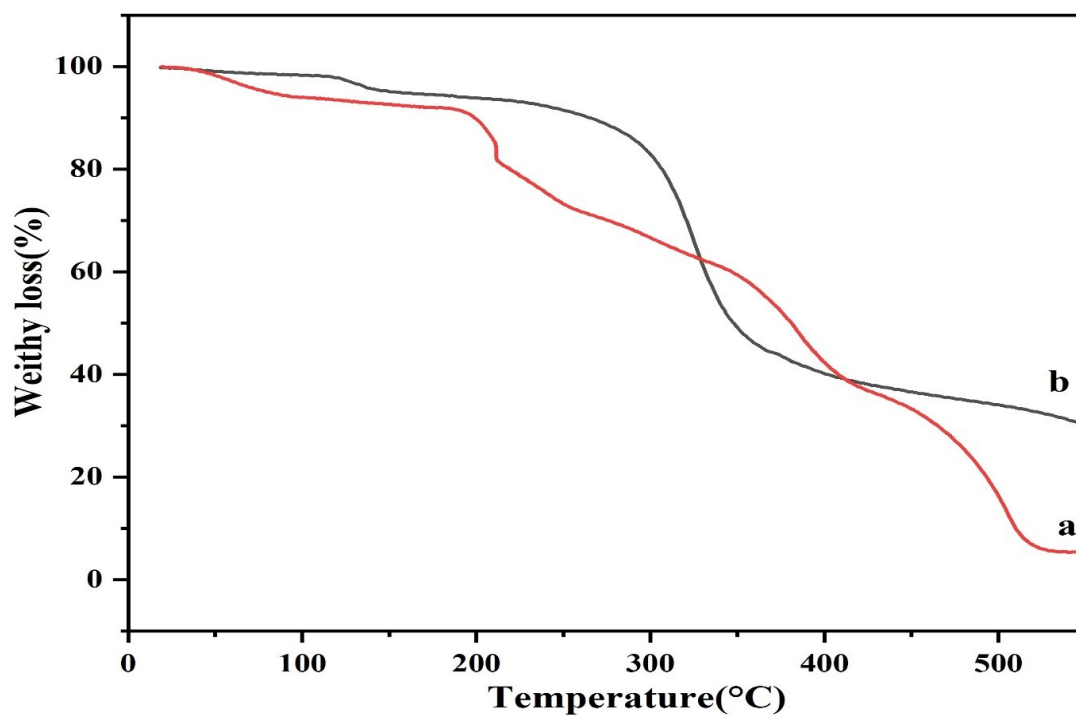

Fig. S6: TGA of 1 (a) and 2 (b).

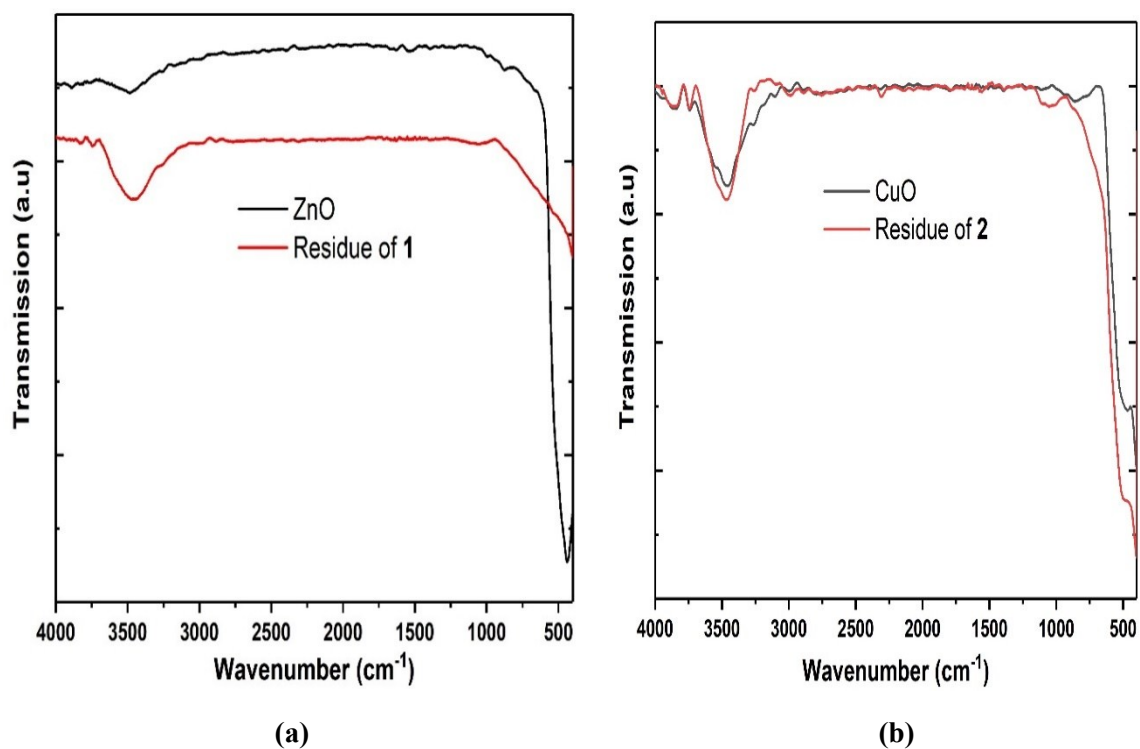

Fig. S7: FTIR spectrum of a) Residue of complex 1, b) Residue of complex 2
